# Supplementary material for: Analysis of two overlapping fragmentation approaches in density matrix construction: GMBE-DM vs. ADMA
Source: Royal Society of Chemistry journal article supplement (doi:10.1039/d3cp05759c), 2024-01-01
Supplement: d3cp05759c1.pdf [file d3cp05759c1.pdf]

## Supplementary Information for “Analysis of two overlapping fragmentation approaches in density matrix construction: GMBE-DM vs ADMA”

Francisco Ballesteros and Ka Un Lao\*

*Department of Chemistry, Virginia Commonwealth University, Richmond, VA 23284 USA*

TABLE S1: MAEs in millihartree (mH) for  $(\text{H}_2\text{O})_{N=6-55}$  at the level of HF/6-31G(d) and HF/def2-TZVPPD using the DM-based GMBE(1)-DM, ADMA, ADMA-S, ADMA-F, and ADMA-F-S approaches with respect to the supersystem results.

| Method                  | MAE    |
|-------------------------|--------|
| GMBE(1)-DM <sup>a</sup> | 16.3   |
| ADMA <sup>a</sup>       | 101.5  |
| ADMA-S <sup>a</sup>     | 434.5  |
| ADMA-F <sup>a</sup>     | 86.0   |
| ADMA-F-S <sup>a</sup>   | 319.6  |
| GMBE(1)-DM <sup>b</sup> | 19.5   |
| ADMA <sup>b</sup>       | 613.0  |
| ADMA-S <sup>b</sup>     | 2524.0 |
| ADMA-F <sup>b</sup>     | 650.1  |
| ADMA-F-S <sup>b</sup>   | 2214.0 |

TABLE S2: MAEs in milliHartree (mH) for  $(\text{H}_2\text{O})_{30}$  with a single ion including eight anions ( $\text{F}^-$ ,  $\text{Cl}^-$ ,  $\text{Br}^-$ ,  $\text{NO}_3^-$ ,  $\text{H}_2\text{PO}_4^-$ ,  $\text{SCN}^-$ ,  $\text{CO}_3^{2-}$ , and  $\text{SO}_4^{2-}$ ) and four cations ( $\text{Li}^+$ ,  $\text{Na}^+$ ,  $\text{K}^+$ , and  $\text{NH}_4^+$ ) being inside or outside of the water cluster using the DM-based GMBE(1)-DM, ADMA, ADMA-S, ADMA-F, and ADMA-F-S approaches with respect to the supersystem calculations at the level of HF/6-31G(d) and HF/def2-TZVPPD.

| Method                  | Cation | Anion  | Inside | Outside | Overall |
|-------------------------|--------|--------|--------|---------|---------|
| GMBE(1)-DM <sup>a</sup> | 31.2   | 16.1   | 28.4   | 13.8    | 21.1    |
| ADMA <sup>a</sup>       | 64.2   | 58.9   | 59.2   | 62.0    | 60.6    |
| ADMA-S <sup>a</sup>     | 213.1  | 517.8  | 466.9  | 365.6   | 416.2   |
| ADMA-F <sup>a</sup>     | 73.9   | 42.3   | 51.2   | 54.5    | 52.8    |
| ADMA-F-S <sup>a</sup>   | 540.0  | 398.9  | 585.8  | 306.1   | 445.9   |
| GMBE(1)-DM <sup>b</sup> | 7.3    | 27.0   | 29.1   | 11.9    | 20.5    |
| ADMA <sup>b</sup>       | 354.0  | 403.3  | 311.7  | 462.1   | 386.9   |
| ADMA-S <sup>b</sup>     | 1859.0 | 2075.4 | 1577.4 | 2429.1  | 2003.3  |
| ADMA-F <sup>b</sup>     | 466.0  | 700.0  | 633.2  | 610.8   | 622.0   |
| ADMA-F-S <sup>b</sup>   | 2087.4 | 2503.8 | 2677.9 | 2052.1  | 2365.0  |

<sup>a</sup>HF/6-31G(d). <sup>b</sup>HF/def2-TZVPPD.

\* email: [laoku@vcu.edu](mailto:laoku@vcu.edu)
